# Supplementary material
Source: PubMed Central journal article supplement (PMC4331739)

Figure S2

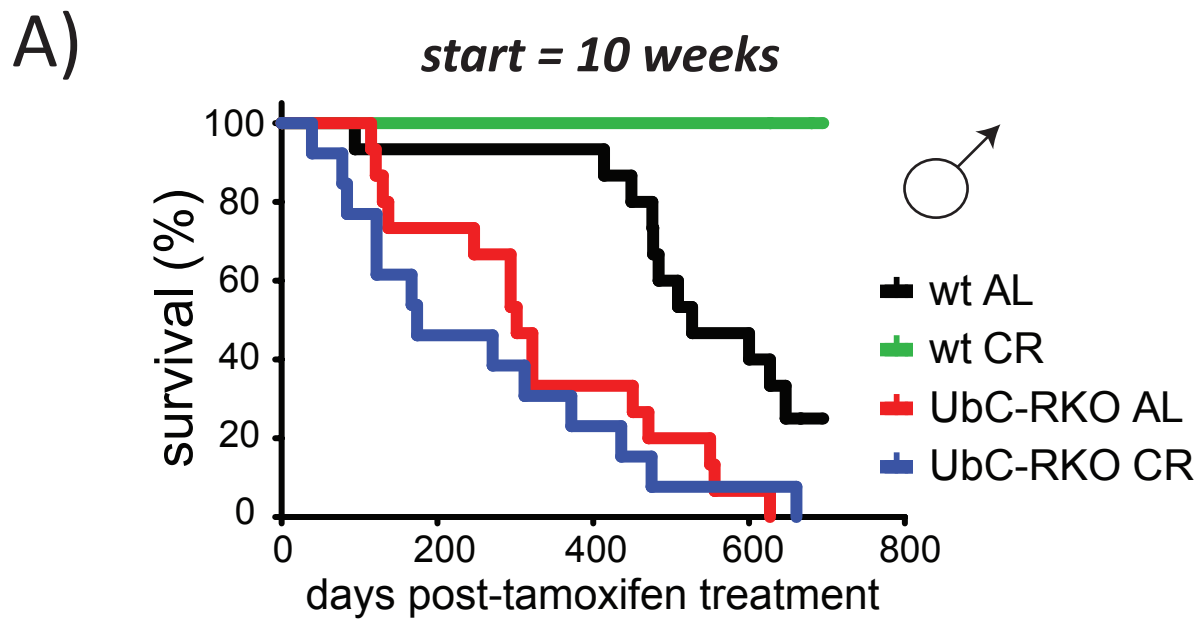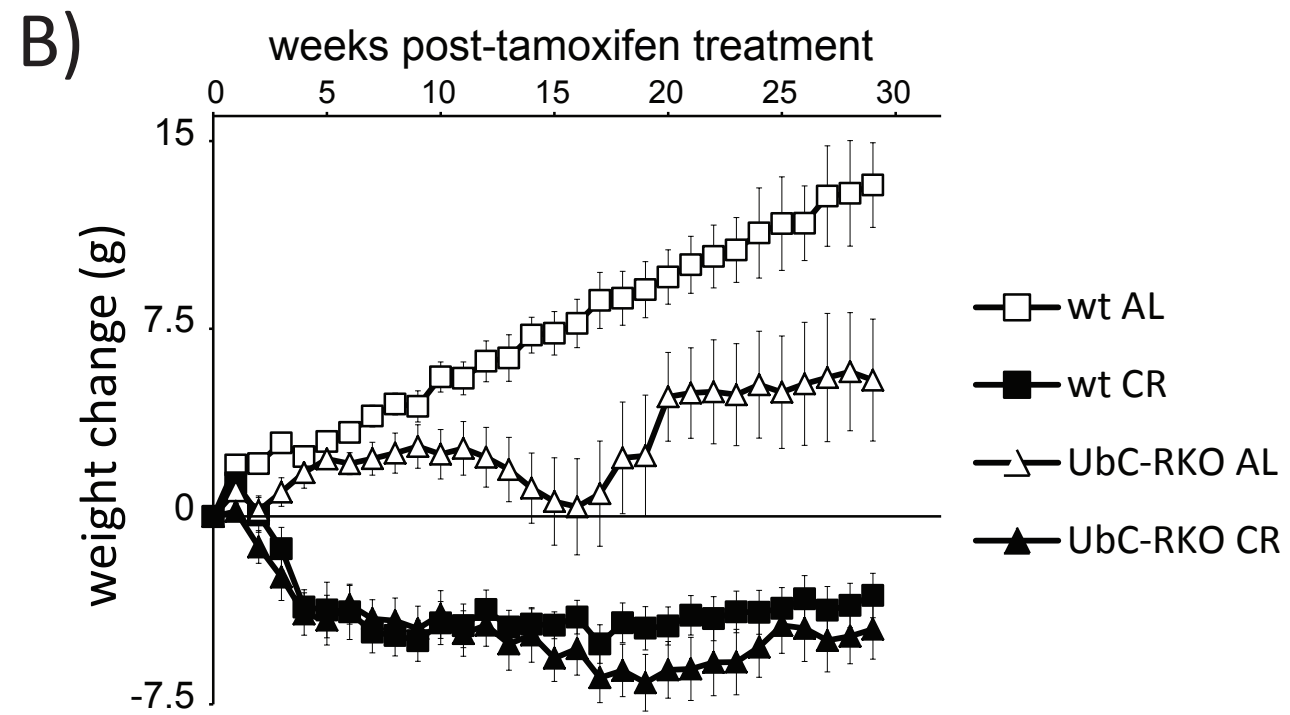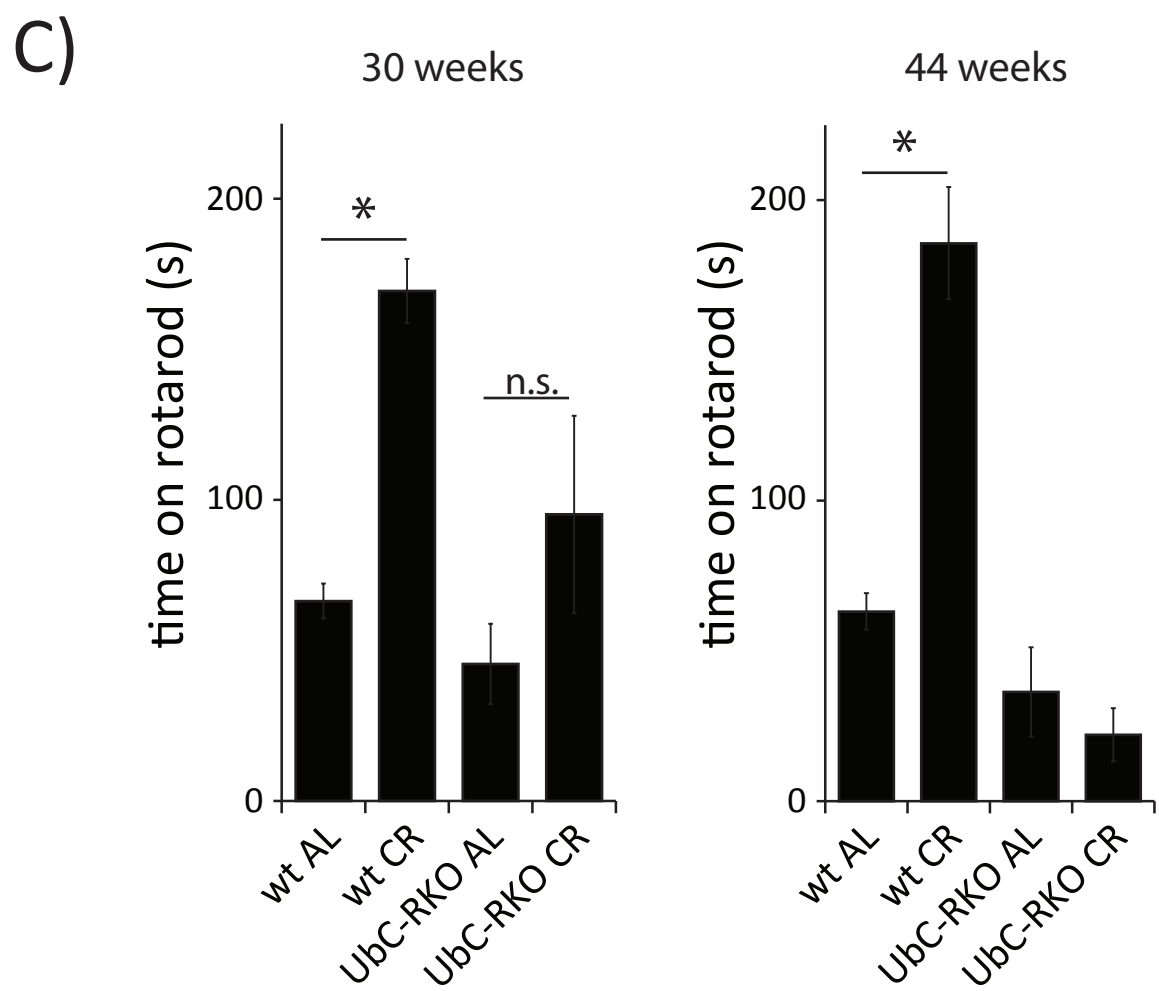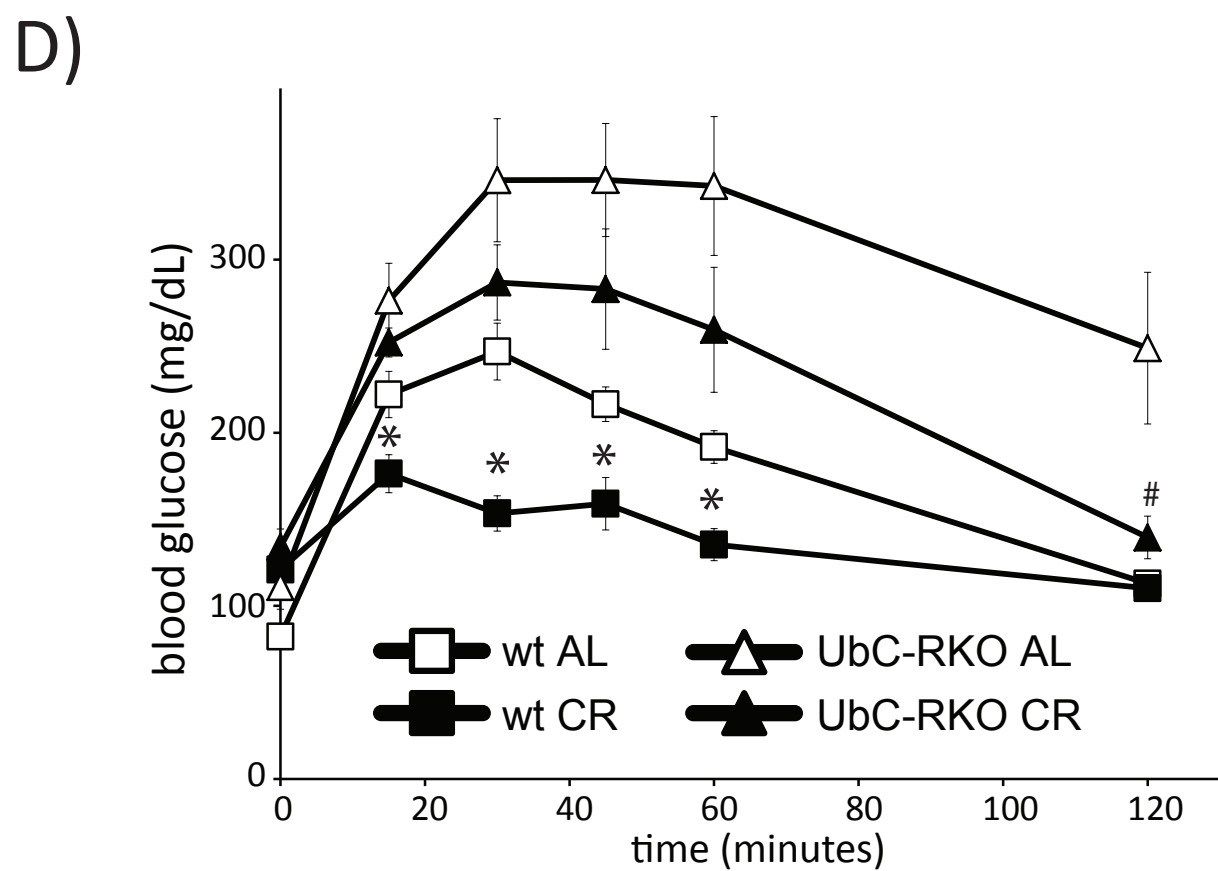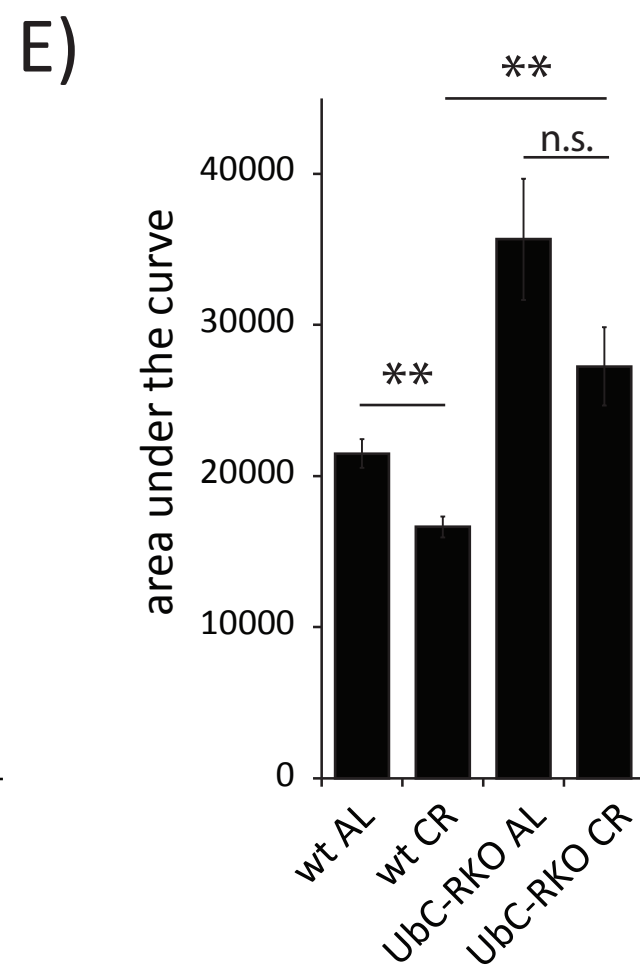

Supplement: acel0013-0911-sd2.pdf [file acel0013-0911-sd2.pdf]
