# Supplementary material
Source: PubMed Central journal article supplement (PMC4331739)

Figure S3

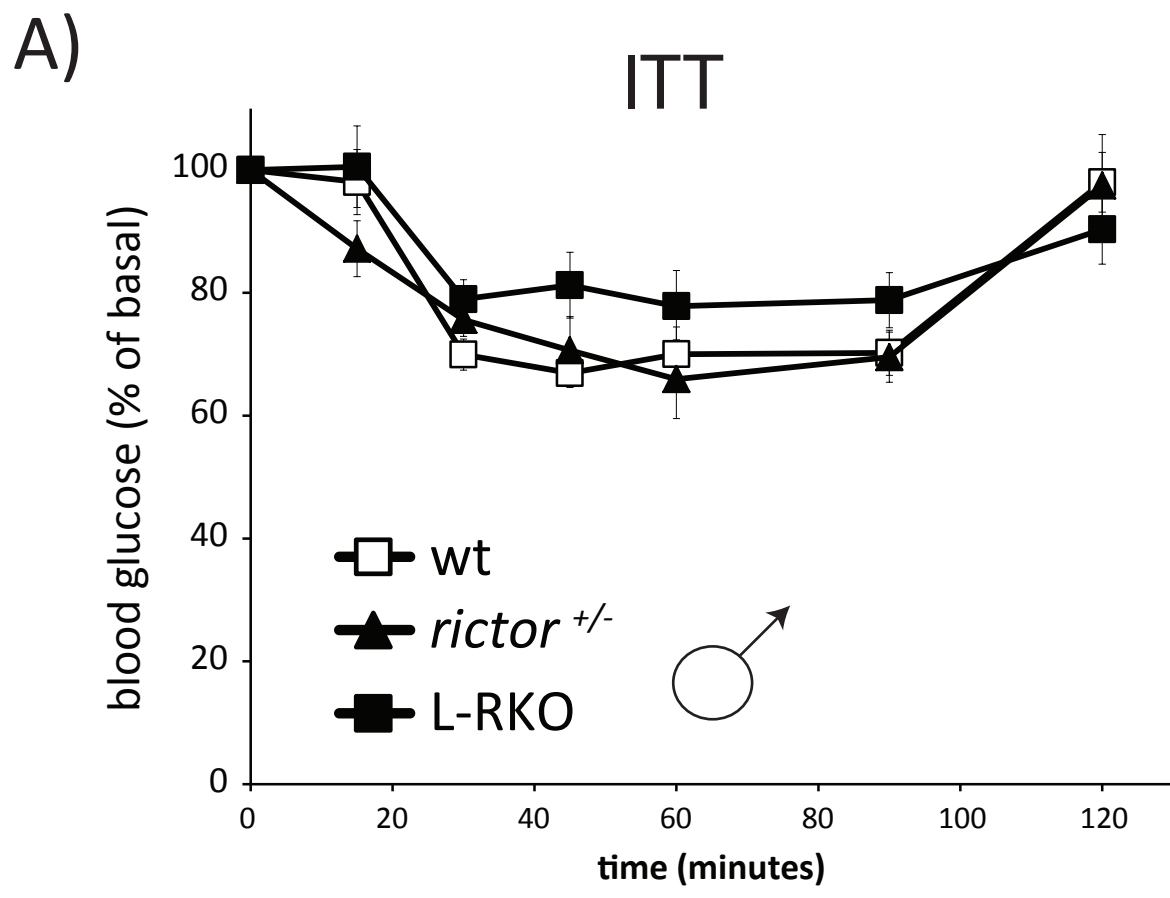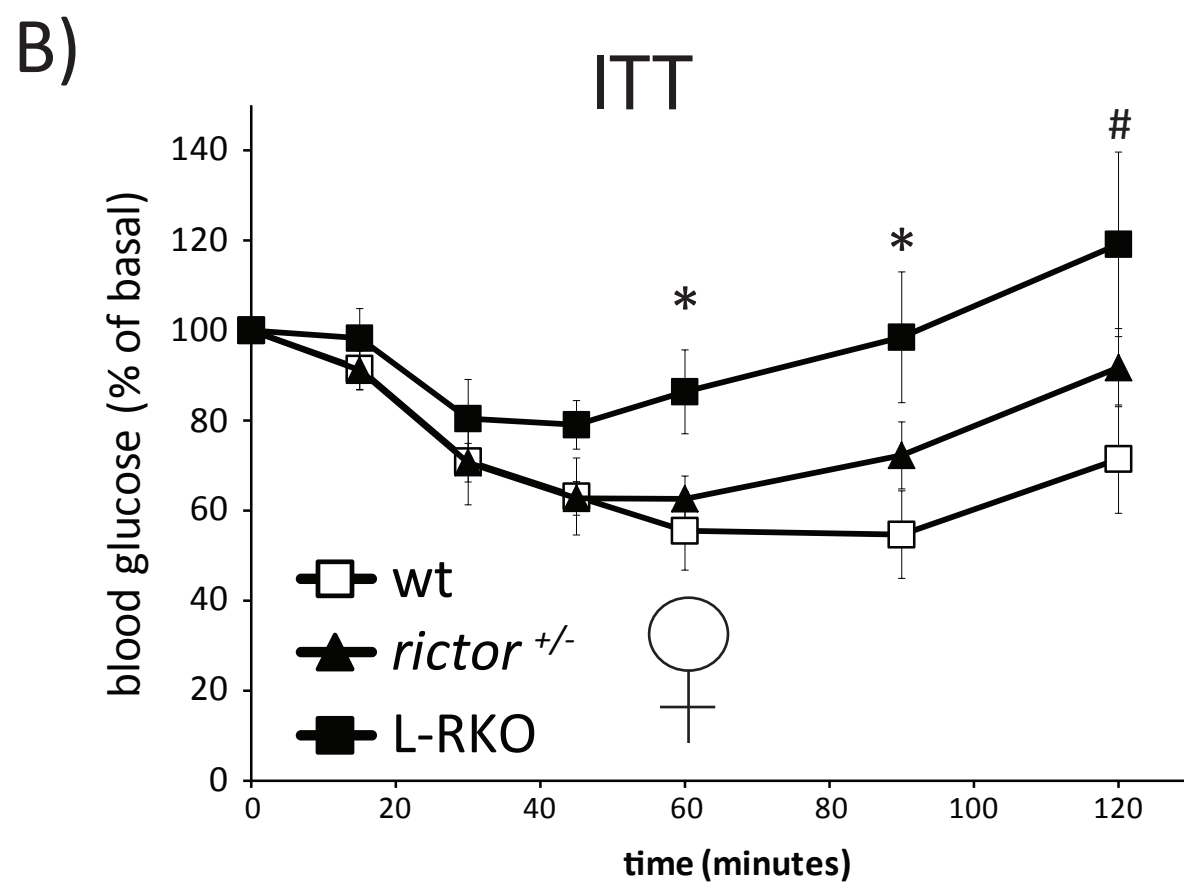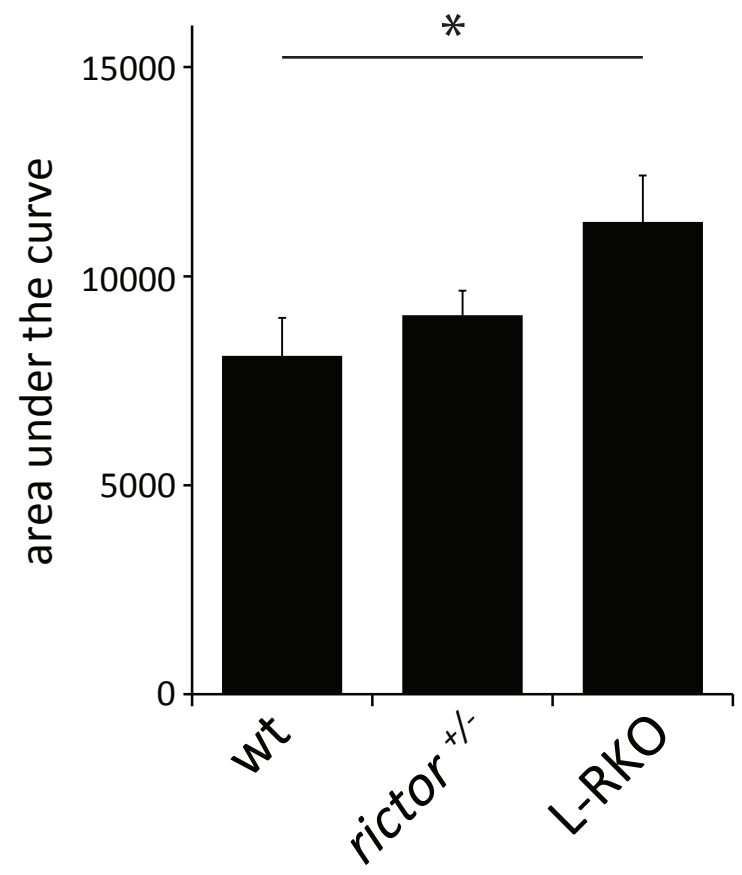

Supplement: acel0013-0911-sd3.pdf [file acel0013-0911-sd3.pdf]
