# Supplementary material
Source: PubMed Central journal article supplement (PMC4331739)
Supplement: acel0013-0911-sd4.pdf [file acel0013-0911-sd4.pdf]

**Supplemental Table 1**

Figure 1

| Males |        | Mean | Median | P value, Log-rank test vs. wt |
|-------|--------|------|--------|-------------------------------|
|       | wt     | 673  | 707    |                               |
|       | L-RKO  | 511  | 502    | 0.0016                        |
|       | riCTOR | 474  | 428    | 0.0002                        |

| Females |        | Mean | Median | P value, Log-rank test vs. wt |
|---------|--------|------|--------|-------------------------------|
|         | wt     | 692  | 734    |                               |
|         | L-RKO  | 694  | 734    | 0.913                         |
|         | riCTOR | 750  | 785    | 0.127                         |

Figure 2

Fig. 2A

|         | Mean  | Median | P value, Log-rank test vs. wt |
|---------|-------|--------|-------------------------------|
| wt      | ---   | 527    |                               |
| UbC-RKO | 329.3 | 302    | 0.0016                        |

Fig. 2B

|         | Mean | Median | P value, Log-rank test vs. wt |
|---------|------|--------|-------------------------------|
| wt      | ---  | 235    |                               |
| UbC-RKO | ---  | 169    | 0.0013                        |

Figure S2

Fig. S2A

|            | Mean  | Median | P value, Log-rank test vs. wt | vs. wt CR | vs. UbC-RKO AL |
|------------|-------|--------|-------------------------------|-----------|----------------|
| wt AL      | ---   | 527    |                               | 0.0013    | 0.0016         |
| wt CR      | ---   | ---    | 0.0013                        |           | < 0.0001       |
| UbC-RKO AL | 329.3 | 302    | 0.0016                        | < 0.0001  |                |
| UbC-RKO CR | 254.8 | 174    | 0.0004                        | < 0.0001  | 0.5356         |
