# Supplementary material
Source: PubMed Central journal article supplement (PMC4331739)
Supplement: acel0013-0911-sd5.pdf [file acel0013-0911-sd5.pdf]

**Supplemental Table 2**

Figure 1

Males

| wt  | L-RKO | <i>ric1</i> <sup>+/-</sup> |
|-----|-------|----------------------------|
| 297 | 322   | 340                        |
| 347 | 325   | 363                        |
| 354 | 341   | 364                        |
| 404 | 345   | 374                        |
| 464 | 393   | 388                        |
| 491 | 397   | 409                        |
| 499 | 400   | 417                        |
| 522 | 477   | 438                        |
| 635 | 489   | 460                        |
| 654 | 515   | 483                        |
| 657 | 534   | 503                        |
| 662 | 591   | 647                        |
| 662 | 599   | 684                        |
| 662 | 624   | 769                        |
| 686 | 638   |                            |
| 728 | 652   |                            |
| 732 | 656   |                            |
| 751 | 900   |                            |
| 753 |       |                            |
| 764 |       |                            |
| 769 |       |                            |
| 774 |       |                            |
| 782 |       |                            |
| 795 |       |                            |
| 826 |       |                            |
| 857 |       |                            |
| 894 |       |                            |
| 899 |       |                            |
| 900 |       |                            |
| 963 |       |                            |

Females

| wt  | L-RKO | <i>ric1</i> <sup>+/-</sup> |
|-----|-------|----------------------------|
| 165 | 449   | 448                        |
| 269 | 462   | 458                        |
| 312 | 467   | 549                        |
| 432 | 468   | 633                        |
| 541 | 490   | 645                        |
| 565 | 512   | 661                        |
| 584 | 516   | 676                        |
| 590 | 612   | 684                        |
| 616 | 615   | 737                        |
| 629 | 628   | 750                        |

Figure 2A

Males

| wt   | UbC-RKO |
|------|---------|
| 94   | 115     |
| 414  | 121     |
| 449  | 130     |
| 476  | 137     |
| 477  | 247     |
| 484  | 294     |
| 509  | 294     |
| 527  | 302     |
| 600  | 322     |
| 627  | 322     |
| 627* | 451     |
| 647  | 471     |
| 666* | 550     |
| 666* | 556     |
| 694* | 627     |

\* = alive at conclusion of experiment

Figure 2B

Males

| wt   | UbC-RKO |
|------|---------|
| 217  | 49      |
| 235  | 105     |
| 253* | 126     |
| 253* | 135     |
| 279* | 149     |
| 279* | 153     |
| 279* | 160     |
| 279* | 169     |
| 306* | 170     |
| 335  | 180     |
|      | 248     |
|      | 253*    |
|      | 253*    |
|      | 279*    |
|      | 306*    |

\* = alive at conclusion of experiment

|     |     |     |
|-----|-----|-----|
| 631 | 629 | 785 |
| 633 | 632 | 802 |
| 654 | 647 | 813 |
| 667 | 658 | 836 |
| 675 | 674 | 846 |
| 680 | 687 | 854 |
| 694 | 734 | 865 |
| 703 | 747 | 871 |
| 720 | 749 | 909 |
| 734 | 753 | 936 |
| 736 | 756 | 991 |
| 737 | 756 |     |
| 758 | 765 |     |
| 759 | 767 |     |
| 767 | 785 |     |
| 773 | 808 |     |
| 773 | 812 |     |
| 782 | 845 |     |
| 783 | 864 |     |
| 810 | 875 |     |
| 822 | 879 |     |
| 837 | 903 |     |
| 856 | 969 |     |
| 867 |     |     |
| 873 |     |     |
| 879 |     |     |
| 892 |     |     |
| 896 |     |     |
| 909 |     |     |

Figure S2A \* = alive at conclusion of experiment

Males

| wt AL | wt CR | Ubc-RKO AL | Ubc-RKO CR |
|-------|-------|------------|------------|
| 94    | 627*  | 115        | 39         |
| 414   | 627*  | 121        | 78         |
| 449   | 627*  | 130        | 84         |
| 476   | 627*  | 137        | 122        |
| 477   | 680*  | 247        | 122        |
| 484   | 680*  | 294        | 167        |
| 509   | 680*  | 294        | 174        |
| 527   | 680*  | 302        | 271        |
| 600   | 694*  | 322        | 312        |
| 627   |       | 322        | 372        |
| 627*  |       | 451        | 436        |
| 647   |       | 471        | 475        |
| 666*  |       | 550        | 661        |
| 666*  |       | 556        |            |
| 694*  |       | 627        |            |
