# Supplementary material
Source: PubMed Central journal article supplement (PMC4331739)
Supplement: acel0013-0911-sd6.pdf [file acel0013-0911-sd6.pdf]

**Supplemental Table 3**

| Males                        | % of mice observed with cancer at death | % of mice examined | number of mice examined |
|------------------------------|-----------------------------------------|--------------------|-------------------------|
| wt                           | 54.2                                    | 80.0               | 24 of 30                |
| <i>riCTOR</i> <sup>+/-</sup> | 9.1                                     | 78.6               | 11 of 14                |
| L-RKO                        | 29.4                                    | 94.4               | 17 of 18                |

1 *riCTOR*<sup>+/-</sup> male was euthanized for head tilt, 1 *riCTOR*<sup>+/-</sup> male euthanized for a deep abscess, and 2 L-RKO males were euthanized due to difficulty breathing

| Females                      | % of mice observed with cancer at death | % of mice examined | number of mice examined |
|------------------------------|-----------------------------------------|--------------------|-------------------------|
| wt                           | 43.8                                    | 82.1               | 32 of 39                |
| <i>riCTOR</i> <sup>+/-</sup> | 31.6                                    | 90.5               | 19 of 21                |
| L-RKO                        | 28.1                                    | 97.0               | 32 of 33                |

4 wt females, 1 *riCTOR*<sup>+/-</sup> female and 3 L-RKO females were euthanized for ulcerations and dermatitis
